# Supplementary material for: Significantly enhanced energy harvesting performance in lead-free piezoceramics via a synergistic design strategy
Source: Royal Society of Chemistry journal article supplement (doi:10.1039/d4mh01902d), 2025-01-01
Supplement: d4mh01902d1.pdf [file d4mh01902d1.pdf]

## Supporting Information

### Significantly enhanced energy harvesting performance in lead-free piezoceramic via a synergistic design strategy

Jianxun Zhang,<sup>‡</sup><sup>a</sup> Qianqian Xu,<sup>‡</sup><sup>a</sup> Yan Zhang,<sup>\*</sup><sup>a</sup> Wei Guo,<sup>\*</sup><sup>b,c</sup> Hanmin Zeng,<sup>a</sup> Yimeng He,<sup>a</sup>  
Jiatao Wu,<sup>b,c</sup> Longlong Guo,<sup>b,c</sup> Kechao Zhou,<sup>a</sup> Dou Zhang<sup>a</sup>

<sup>a</sup> State Key Laboratory of Powder Metallurgy, Central South University, Changsha, Hunan, 410083, China.

<sup>b</sup> School of Civil Engineering, Central South University, Changsha, Hunan, 410075, China.

<sup>c</sup> National Engineering Research Center of High-speed Railway Construction Technology, Changsha, Hunan, 410075, China.

Email: [yanzhangcsu@csu.edu.cn](mailto:yanzhangcsu@csu.edu.cn), [guowei@csu.edu.cn](mailto:guowei@csu.edu.cn)

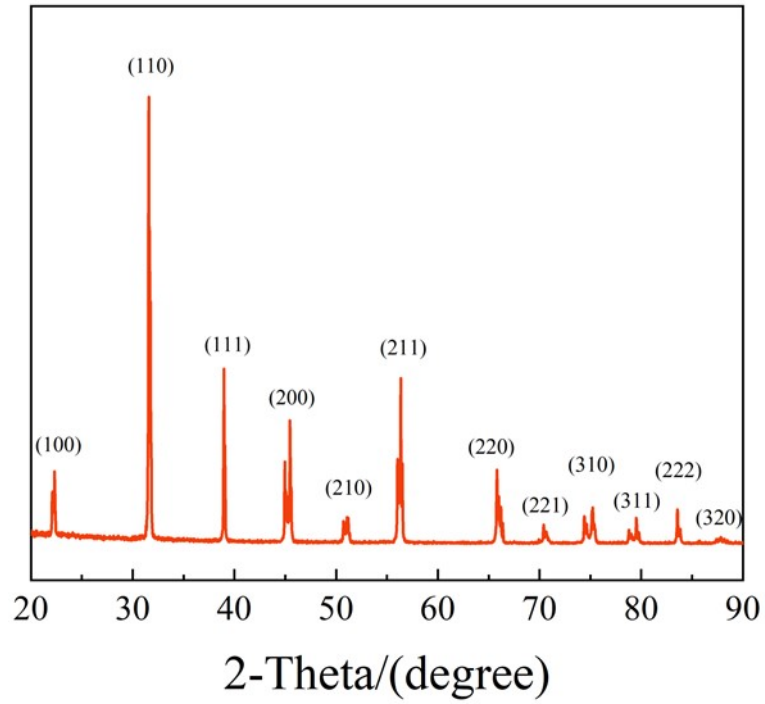

**Fig. S1.** XRD pattern of barium titanate powder.

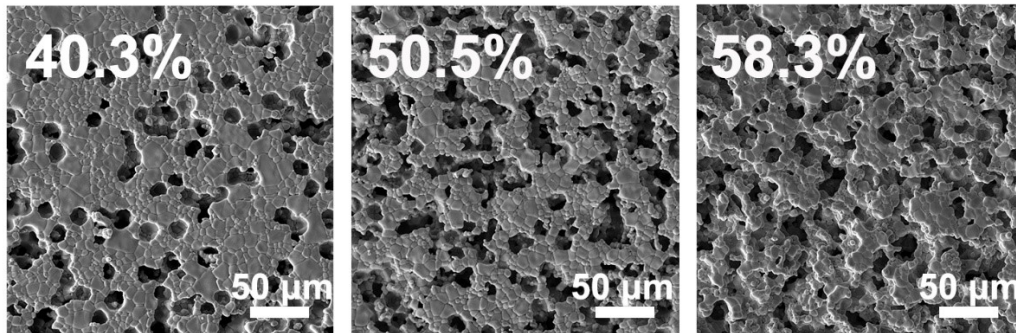

**Fig. S2.** SEM images (scale bar = 50 μm) of random porous BTO piezoceramics with porosity fraction of 40.3 %, 50.5 %, 58.3 %, respectively.

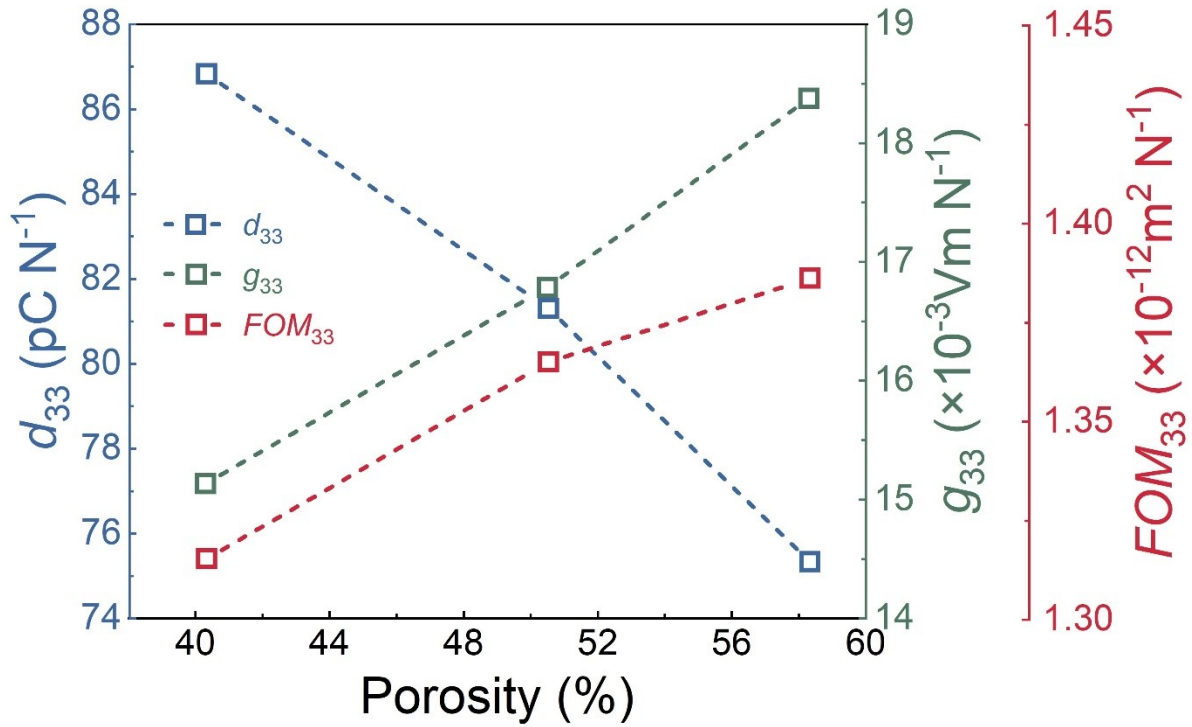

**Fig. S3.** Variation of piezoelectric coefficient ( $d_{33}$ ), piezoelectric voltage coefficient ( $g_{33}$ ) and piezoelectric energy harvesting figure of merit ( $FoM_{33}$ ) for range of porosities of random porous ceramics.

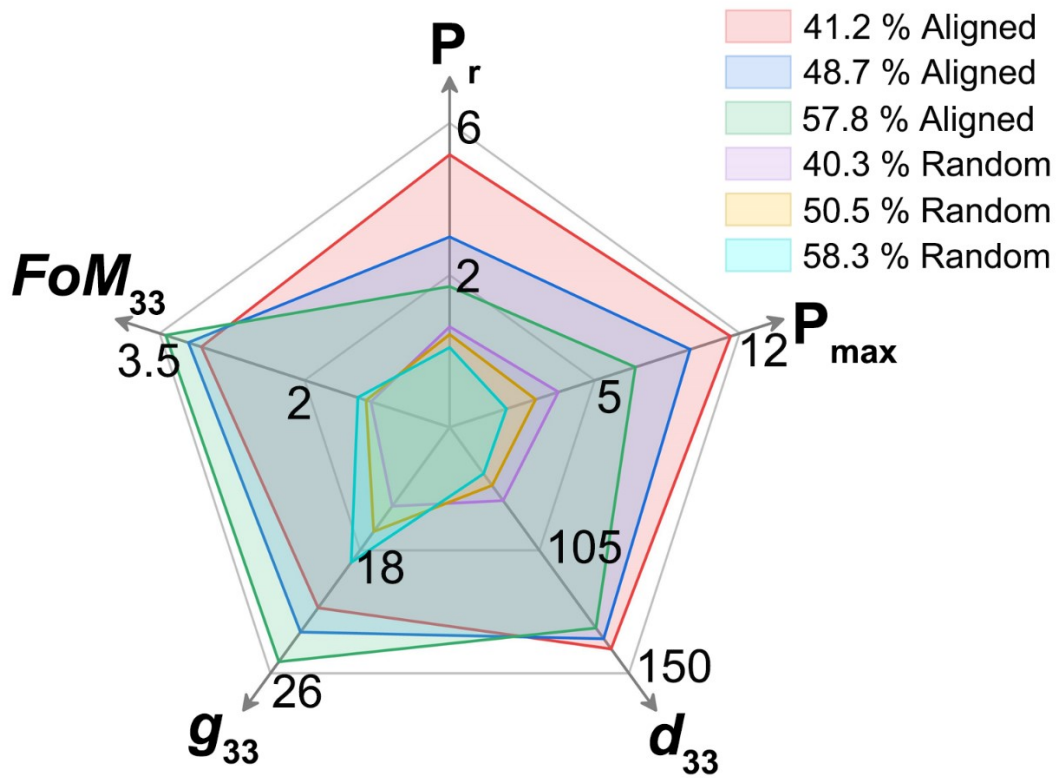

**Fig. S4.** Statistical diagram of electrical properties of BTO ceramics with different pore structures.

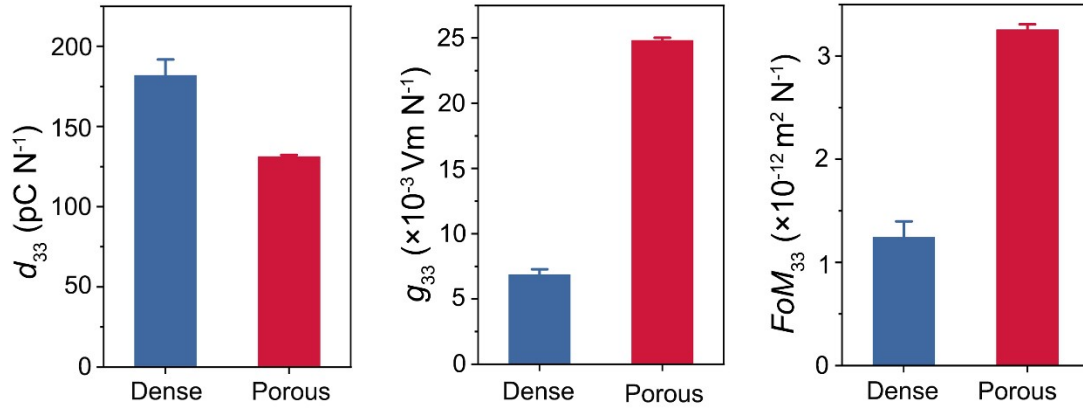

**Fig. S5.** The piezoelectric properties of aligned porous BTO ceramic (porosity fraction of 57.8 %) and dense BTO ceramic.

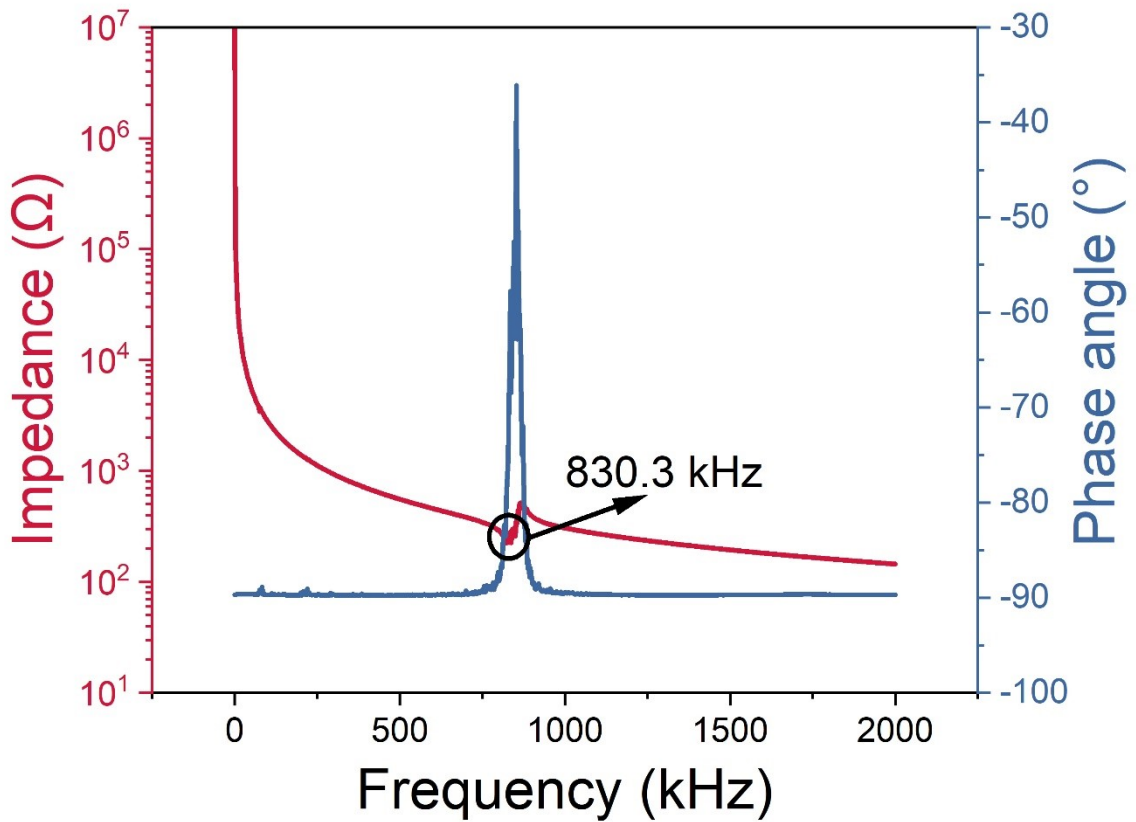

**Fig. S6.** The electric resonance frequency of the aligned porous BTO ceramics with 50 % porosity.

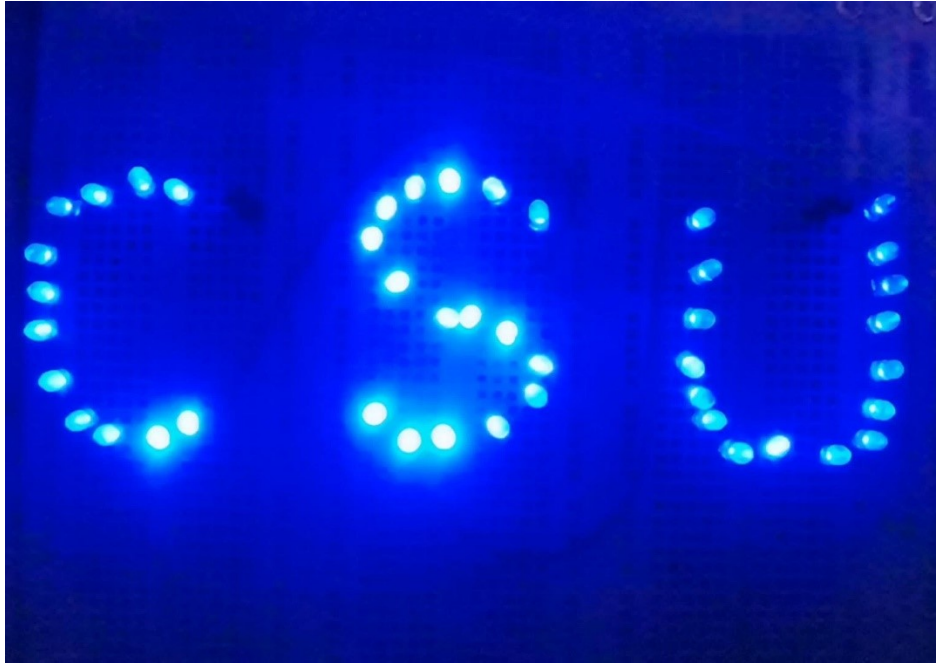

**Fig. S7.** Optical image showing 45 LEDs illuminated by piezoelectric energy harvester.

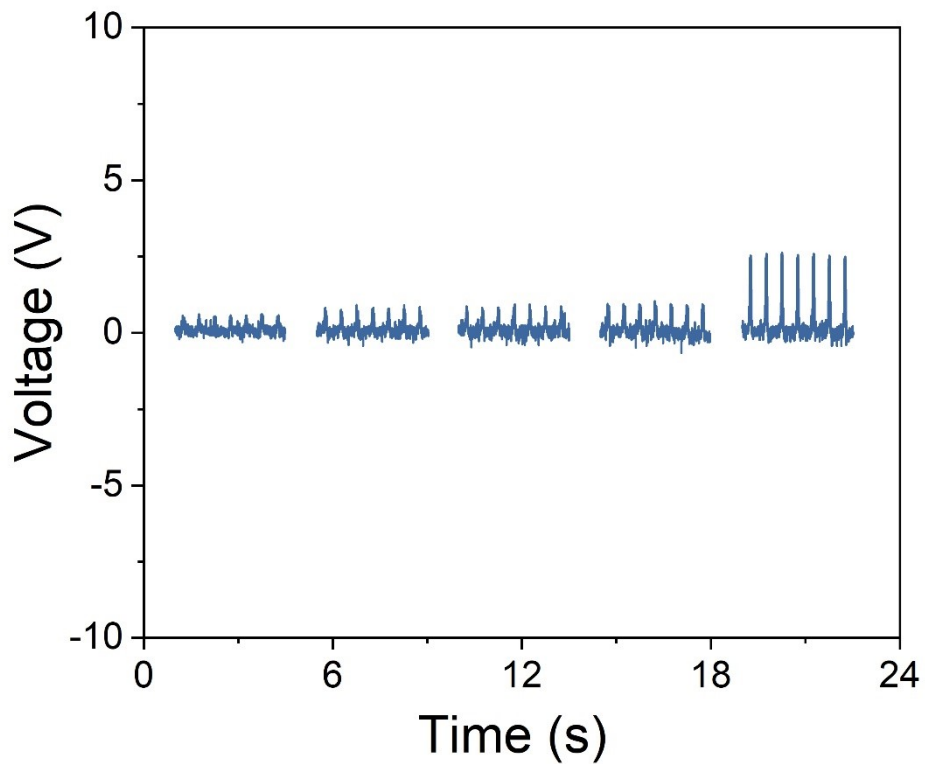

**Fig. S8.** Output voltage generated by non-polarized piezoelectric energy harvester.

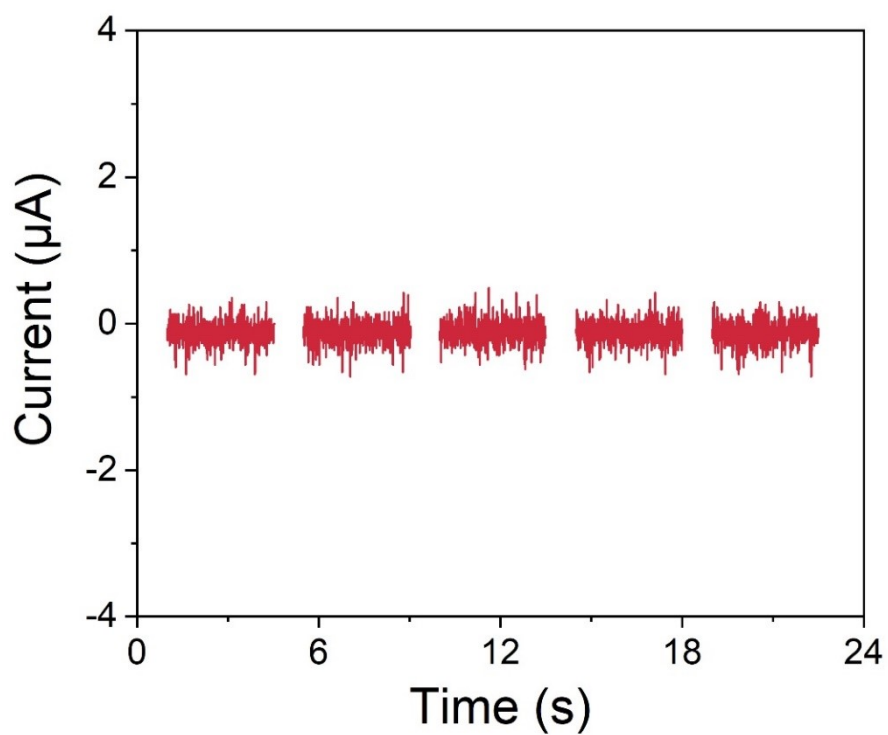

Fig. S9. Output current generated by non-polarized piezoelectric energy harvester.

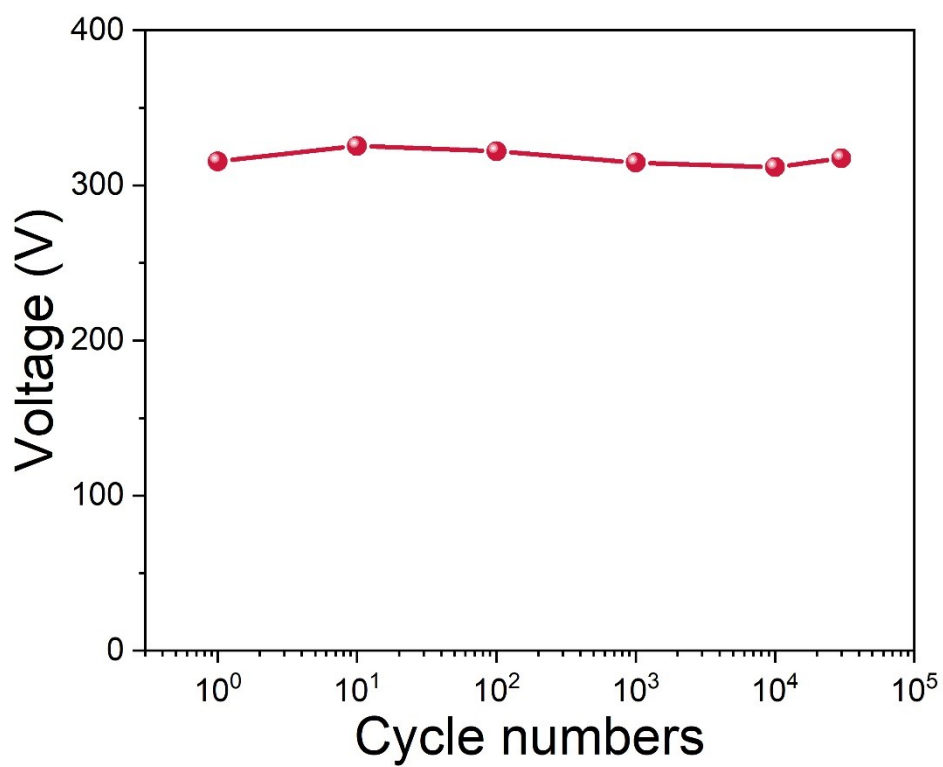

Fig. S10. The extended fatigue tests of the piezoelectric energy harvesters over 30,000 cycles.

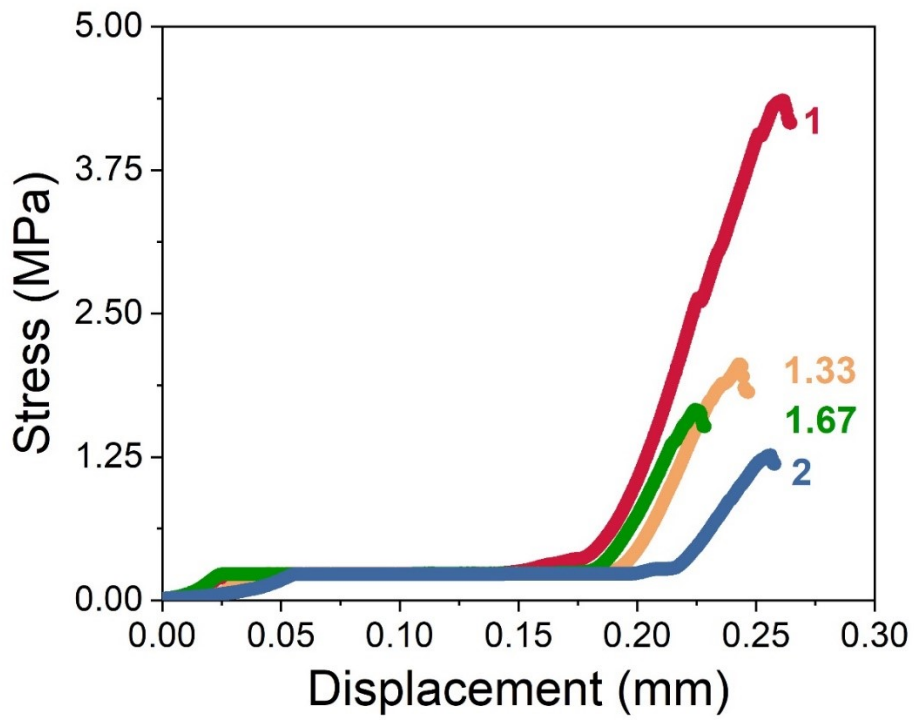

**Fig. S11.** Compressive stress with displacement for the piezoelectric energy harvesters with different aspect ratios.

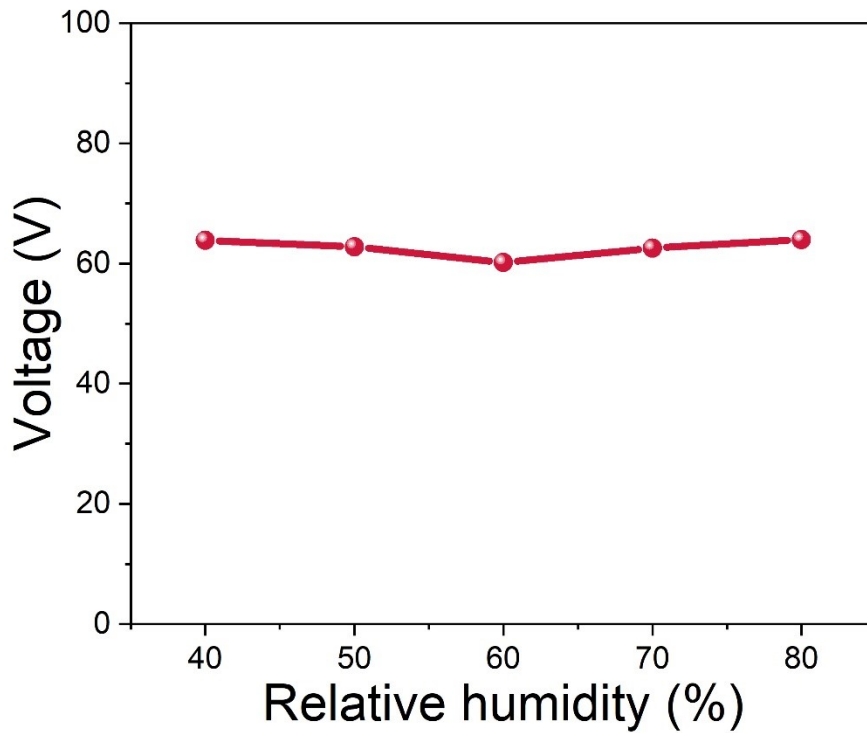

**Fig. S12.** The output voltage of the piezoelectric energy harvesters under different humidity conditions.



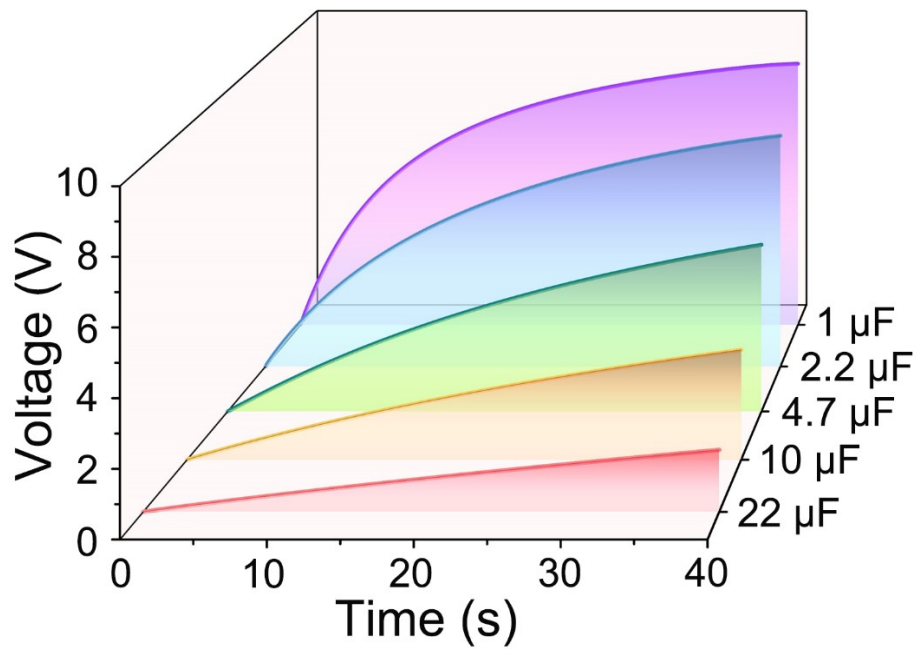

**Fig. S13.** Charging curves of the commercial capacitors (1, 2.2, 4.7, 10 and 22  $\mu\text{F}$ ) charged by piezoelectric energy harvester in 40 s.

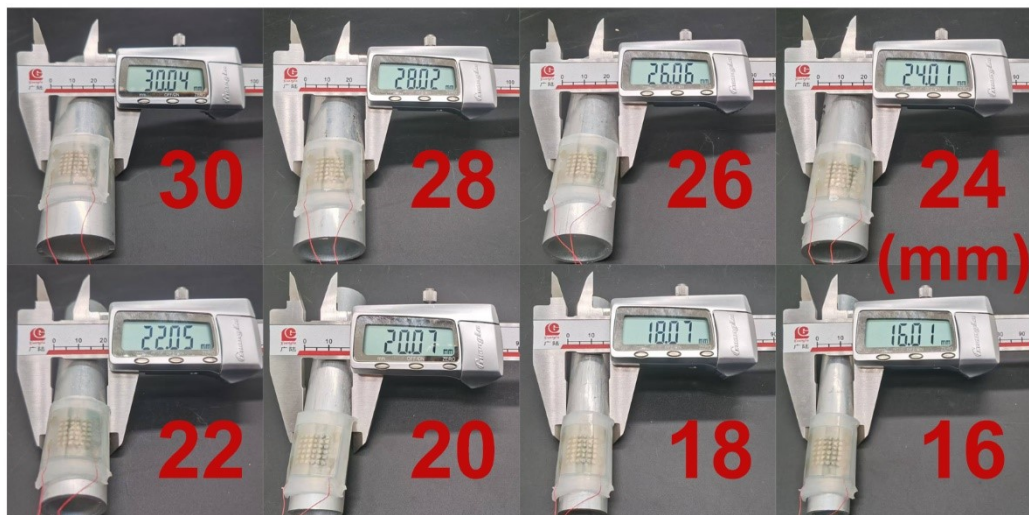

**Fig. S14.** The digital photo of piezoceramic energy harvesters attached to a series of stainless-steel tubes.



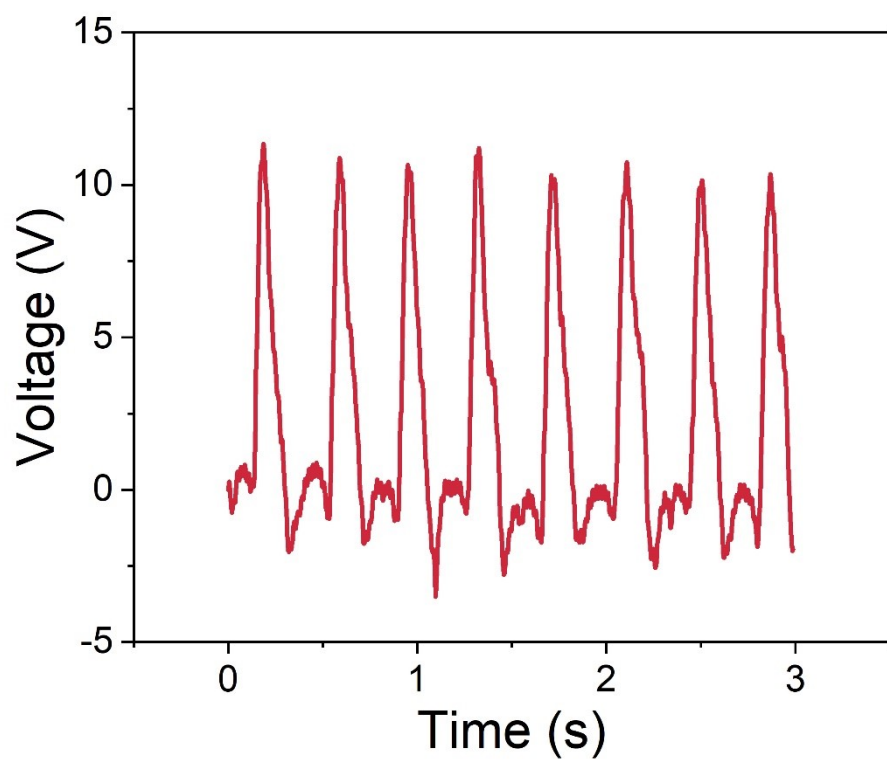

**Fig. S15.** Electrical signals generated by the piezoelectric energy harvester attached to wrists.

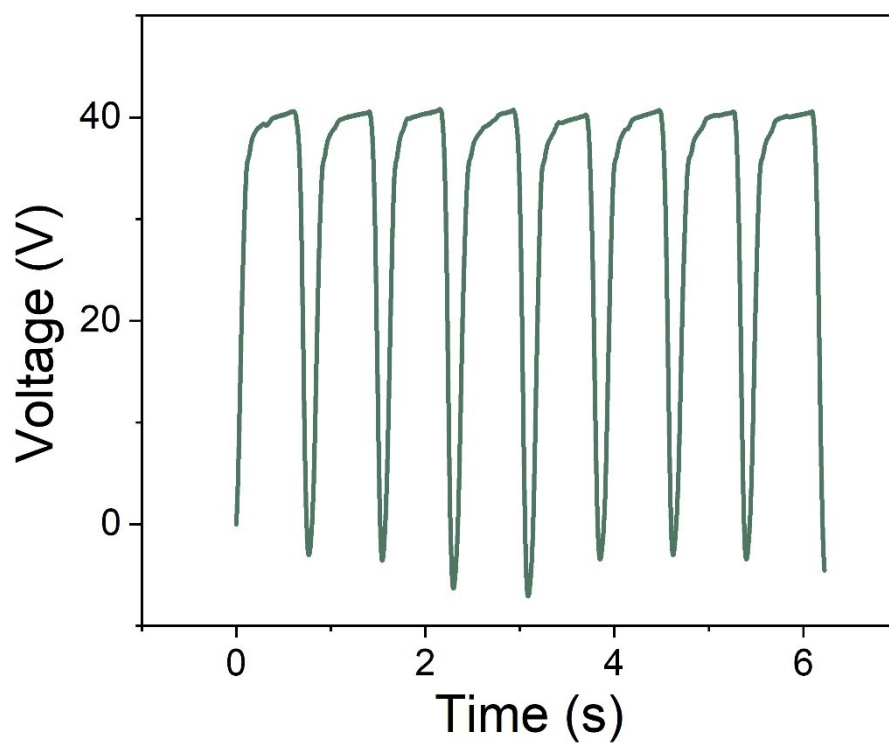

**Fig. S16.** Electrical signals generated by the piezoelectric energy harvester attached to fingers.

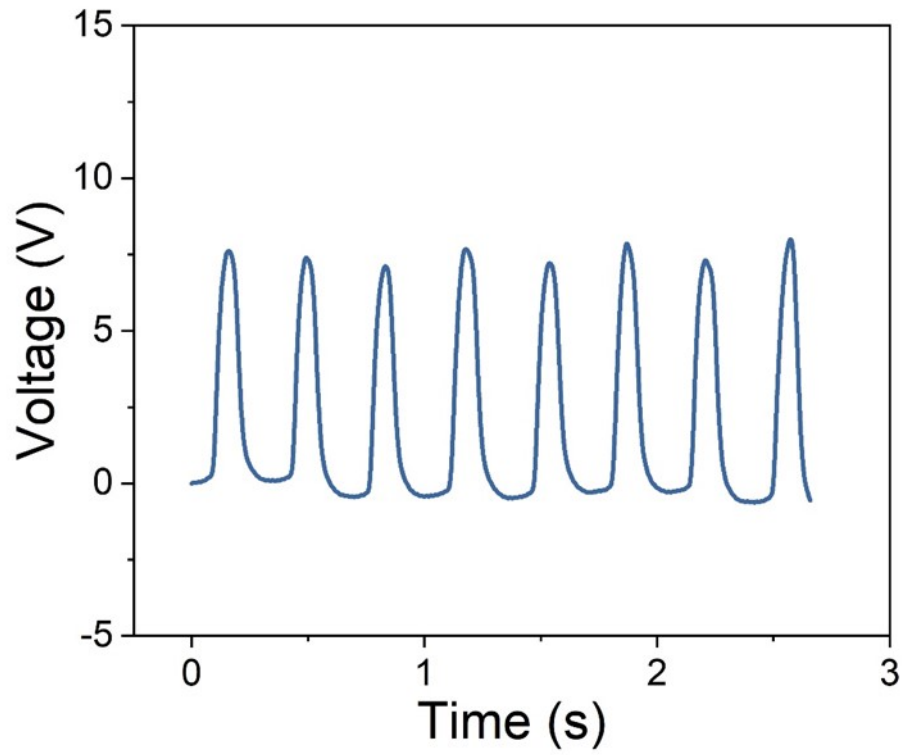

**Fig. S17.** Electrical signals generated by the piezoelectric energy harvester when tapped by fingers.

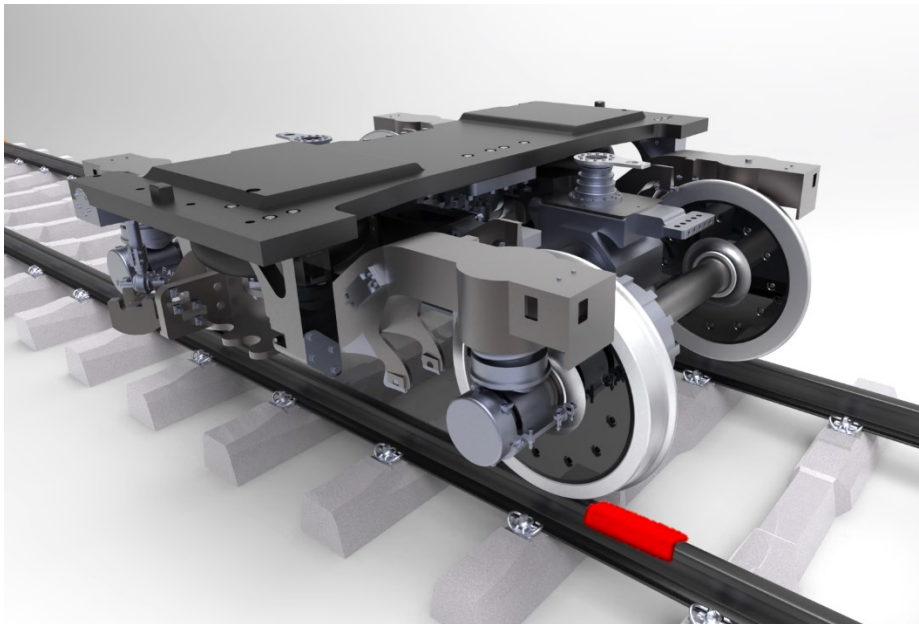

**Fig. S18.** Schematic of the bogie and the track when the train is about to pass the obstacle.

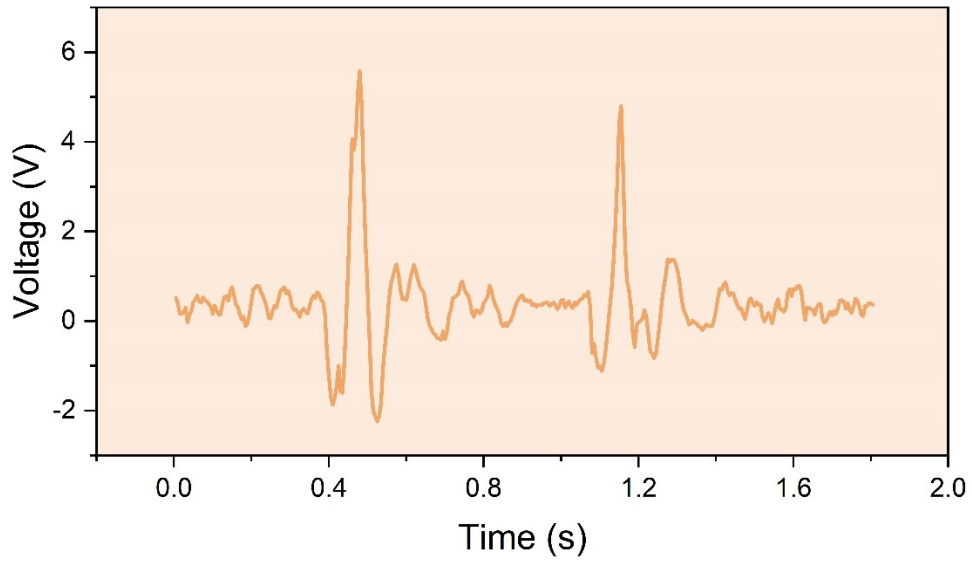

**Fig. S19.** Voltage response of the piezoelectric sensor when the right side of the train bogie pass obstacles

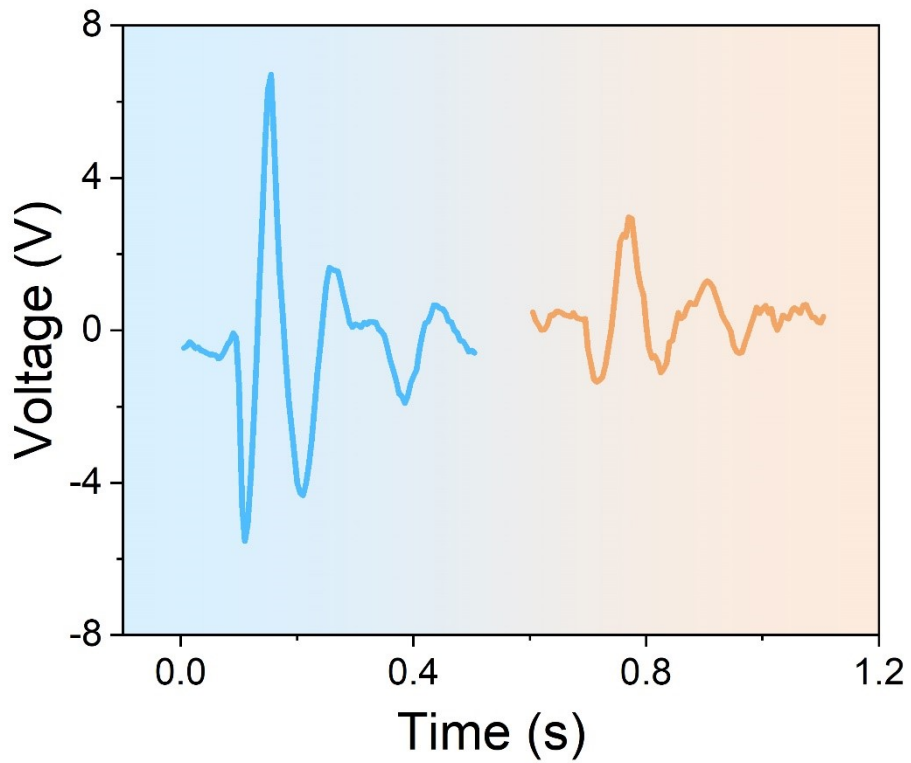

**Fig. S20.** Comparison of signals from the left and right sides of the train bogie pass obstacles.

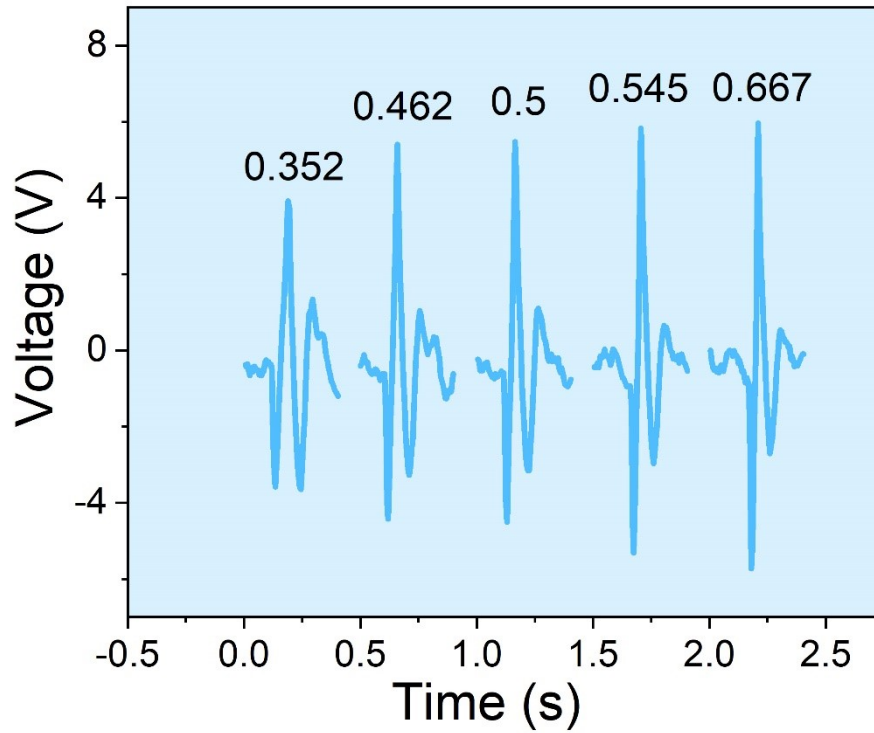

**Fig. S21.** Output voltage of the piezoelectric sensor applied in train monitoring at a train speed of 0.352, 0.462, 0.5, 0.545, 0.667  $\text{m s}^{-1}$  and height of obstacle of 3 mm.

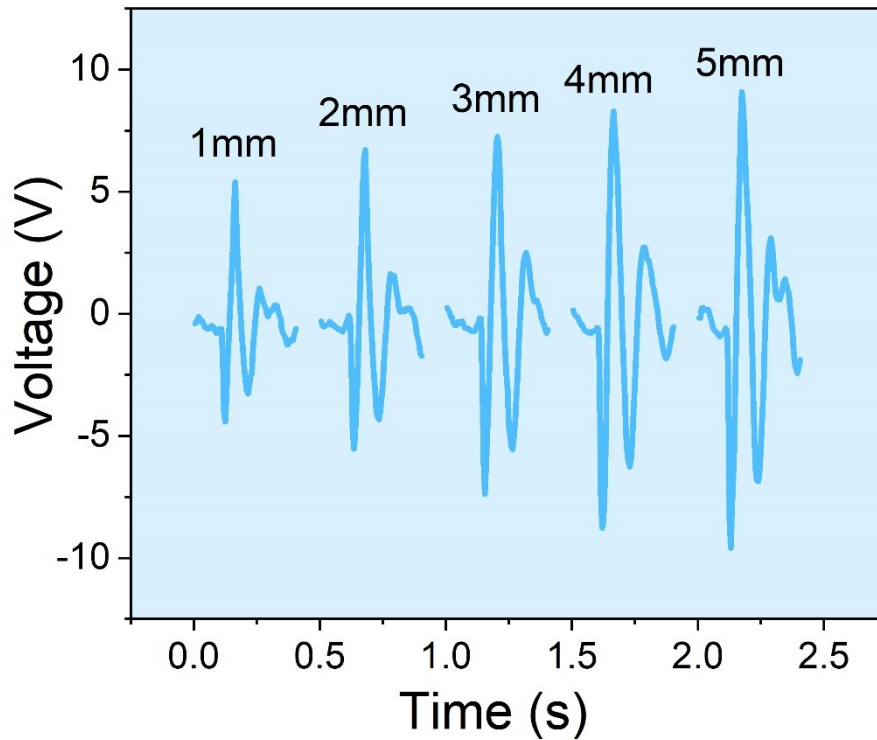

**Fig. S22.** Output voltage of the piezoelectric sensor applied in train monitoring at the height of obstacle of 1, 2, 3, 4, 5 mm and train speed of 0.462  $\text{m s}^{-1}$ .

**Table S1.** Piezoelectric and dielectric properties of aligned porous ceramics with different porosity.

| Porosity (%) | Relative permittivity | $d_{33}$ (pC N <sup>-1</sup> ) | $g_{33}$ (10 <sup>-3</sup> V m N <sup>-1</sup> ) | $FoM_{33}$ (×10 <sup>-12</sup> m <sup>2</sup> N <sup>-2</sup> ) |
|--------------|-----------------------|--------------------------------|--------------------------------------------------|-----------------------------------------------------------------|
| 41.2         | 732.5                 | 141.0                          | 21.74                                            | 3.07                                                            |
| 48.7         | 665.2                 | 135.8                          | 23.06                                            | 3.13                                                            |
| 57.8         | 596.8                 | 131.2                          | 24.82                                            | 3.26                                                            |

**Table S2.** Piezoelectric and dielectric properties of random porous ceramics with different porosity.

| Porosity (%) | Relative permittivity | $d_{33}$ (pC N <sup>-1</sup> ) | $g_{33}$ (10 <sup>-3</sup> Vm N <sup>-1</sup> ) | $FoM_{33}$ (×10 <sup>-12</sup> m <sup>2</sup> N <sup>-2</sup> ) |
|--------------|-----------------------|--------------------------------|-------------------------------------------------|-----------------------------------------------------------------|
| 40.3         | 647.9                 | 86.8                           | 15.13                                           | 1.32                                                            |
| 50.5         | 547                   | 81.3                           | 16.79                                           | 1.37                                                            |
| 58.3         | 463.5                 | 75.3                           | 18.38                                           | 1.39                                                            |

**Table S3.** The results of finite element simulations of the piezoelectric energy harvesters with different aspect ratios.

| Aspect ratio | Stress (N m <sup>-2</sup> ) | Electric field (V) | Potential (V m <sup>-1</sup> ) |
|--------------|-----------------------------|--------------------|--------------------------------|
| 1            | 1.57×10 <sup>6</sup>        | 1.89               | 1.26×10 <sup>4</sup>           |
| 1.33         | 1.64×10 <sup>6</sup>        | 2.08               | 1.72×10 <sup>4</sup>           |
| 1.67         | 2.18×10 <sup>6</sup>        | 2.14               | 2.74×10 <sup>4</sup>           |
| 2            | 2.95×10 <sup>6</sup>        | 2.19               | 3.43×10 <sup>4</sup>           |
